# Supplementary material for: Colorimetric and optical discrimination of halides by a simple chemosensor
Source: Royal Society of Chemistry journal article supplement (doi:10.1039/c5ra02372f), 2015-01-01
Supplement: c5ra02372f1.pdf [file c5ra02372f1.pdf]

## Colorimetric and optical discrimination of halides by a simple chemosensor

Syed A. Haque<sup>a</sup>, Robert L. Bolhofner<sup>a</sup>, Bryan M. Wong<sup>b,\*</sup>, and Md. Alamgir Hossain<sup>a,\*</sup>

<sup>a</sup>*Department of Chemistry and Biochemistry, Jackson State University, Jackson, MS 39217, USA*

<sup>b</sup>*Department of Chemical & Environmental Engineering and Materials Science & Engineering Program, University of California, Riverside, Riverside, CA 92521, USA*

\*Corresponding authors:

E-mail address: alamgir.hossain@jsums.edu; bryan.wong@ucr.edu

Fax: 601-979-3674; Tel: 601-979-3748

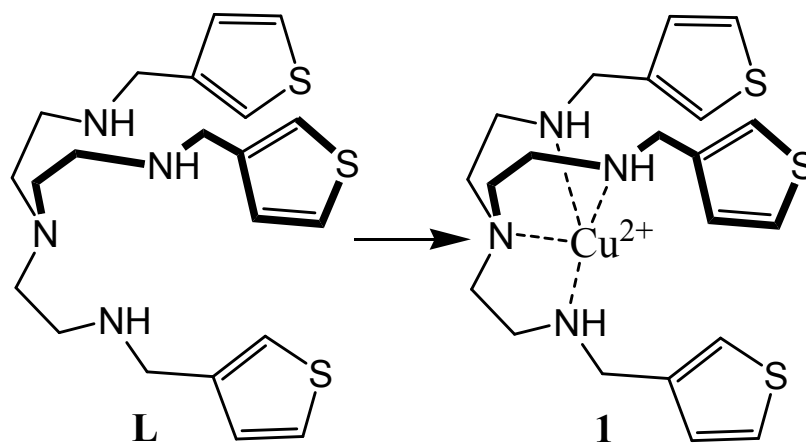

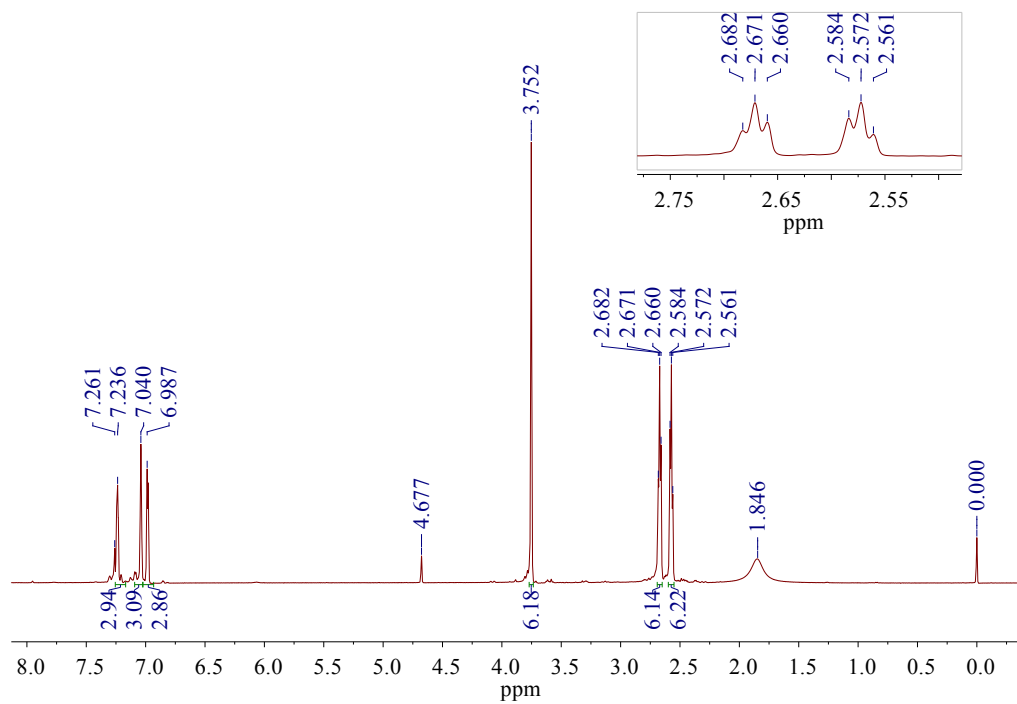

**Fig S1:** <sup>1</sup>H NMR spectrum of L in CDCl<sub>3</sub>

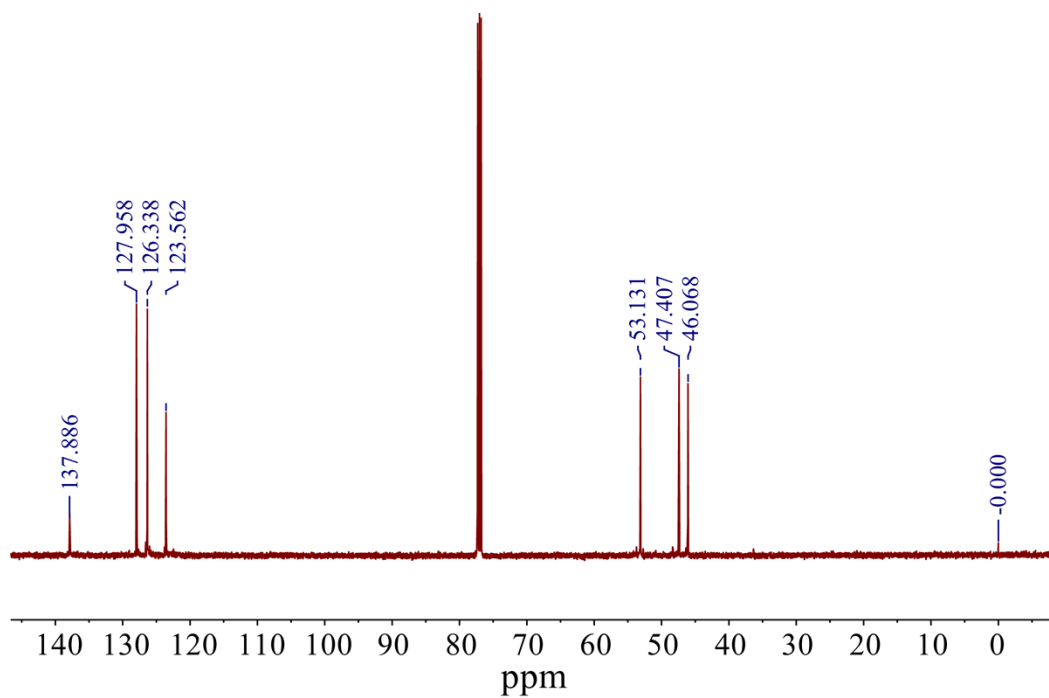

**Fig S2:** <sup>13</sup>C NMR spectrum of L in CDCl<sub>3</sub>

3-TEA#35 RT: 0.34 AV: 1 NL: 1.70E8  
T: + c ESI Q1MS [100.000-1000.000]

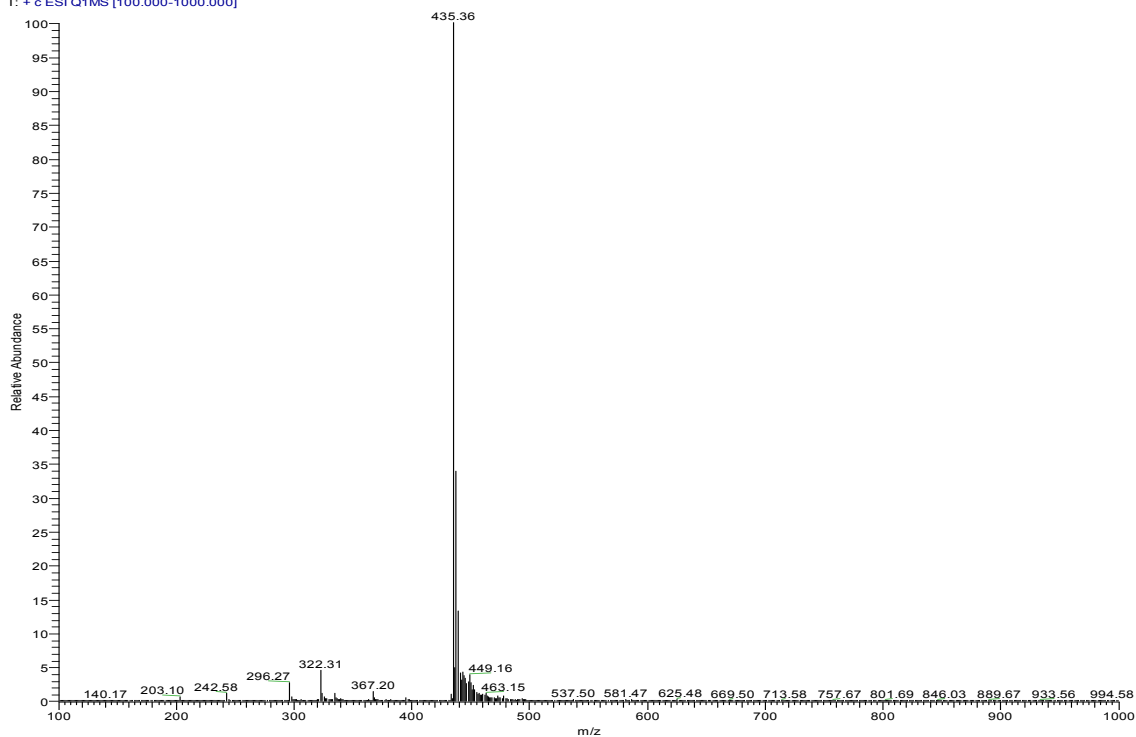

Fig. S3: Mass spectrum of L.

11-11-Syed-1 #252 RT: 2.39 AV: 1 NL: 1.12E7  
T: + c ESI Q1MS [200.000-2000.000]

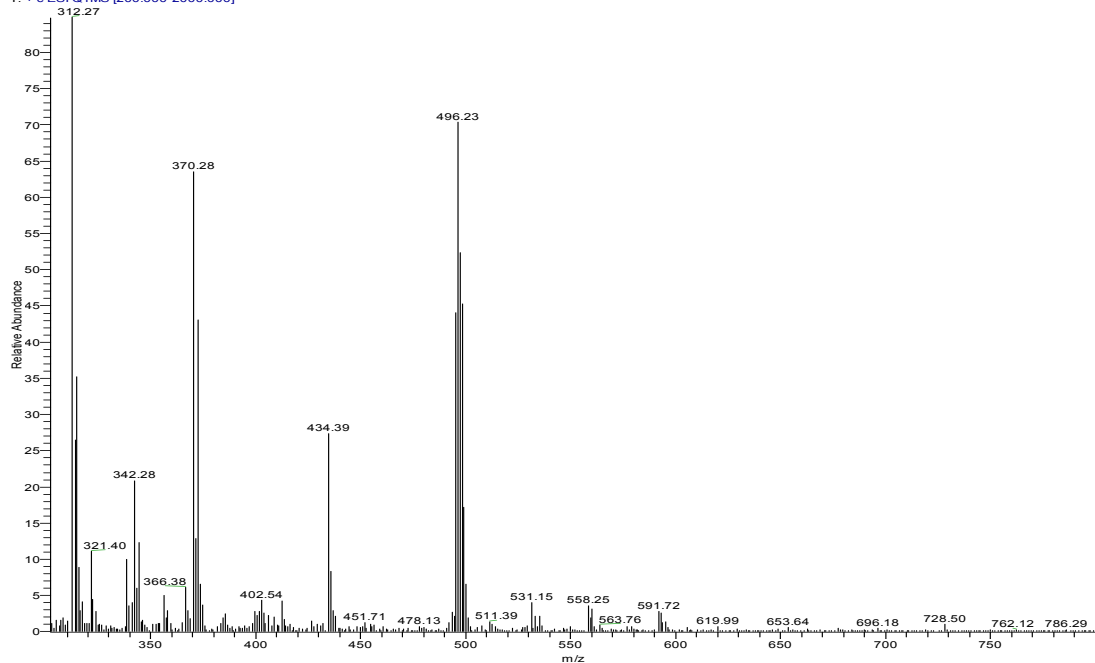

Fig. S4: Mass spectrum of 1

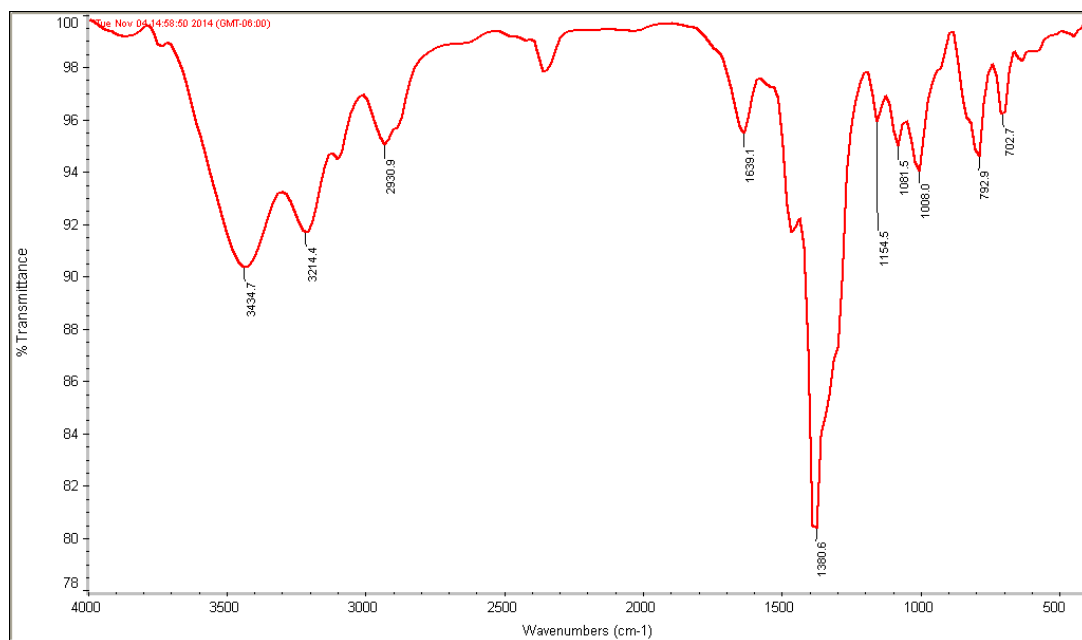

**Fig. S5.** IR spectrum of **1**.

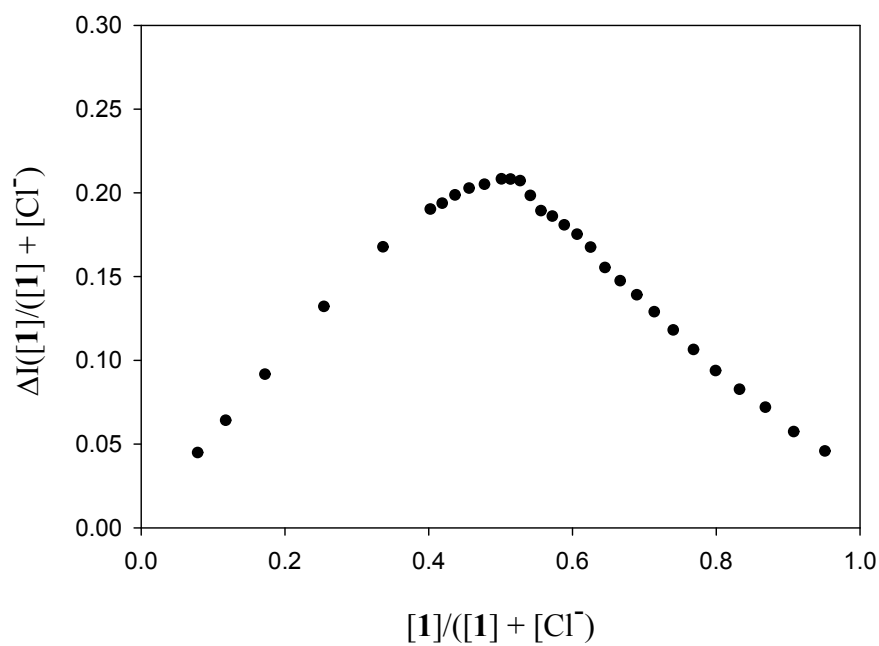

**Fig. S6.** Job plot analysis of **1** for the binding of chloride in CH<sub>3</sub>CN. The change of the absorbance ( $\Delta I$ ) of **1** was determined from the titration plot as shown in Figure 5b.

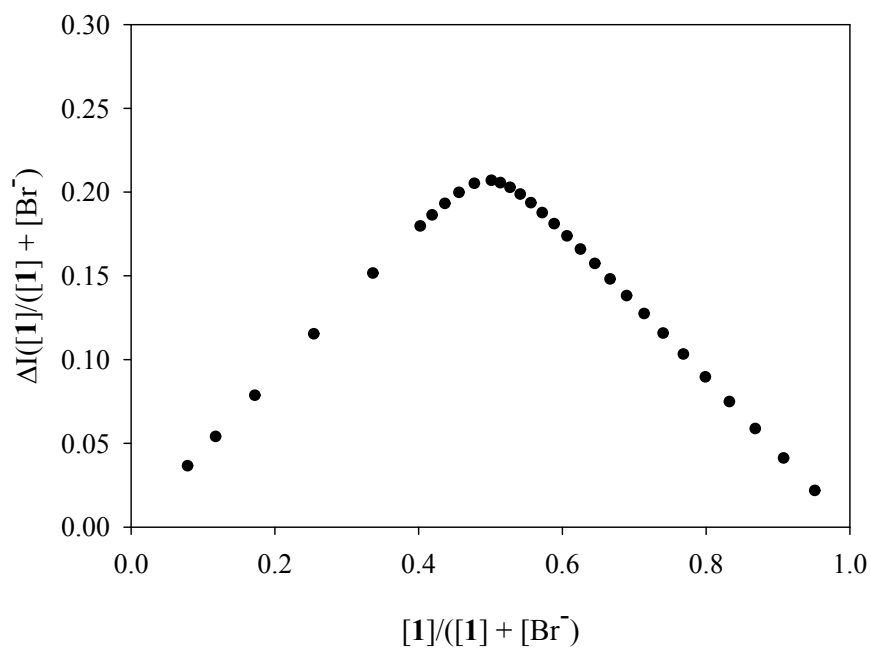

**Fig. S7.** Job plot analysis of **1** for the binding of bromide in  $\text{CH}_3\text{CN}$ . The change of the absorbance ( $\Delta I$ ) of **1** was determined from the titration plot as shown in Figure 5c.

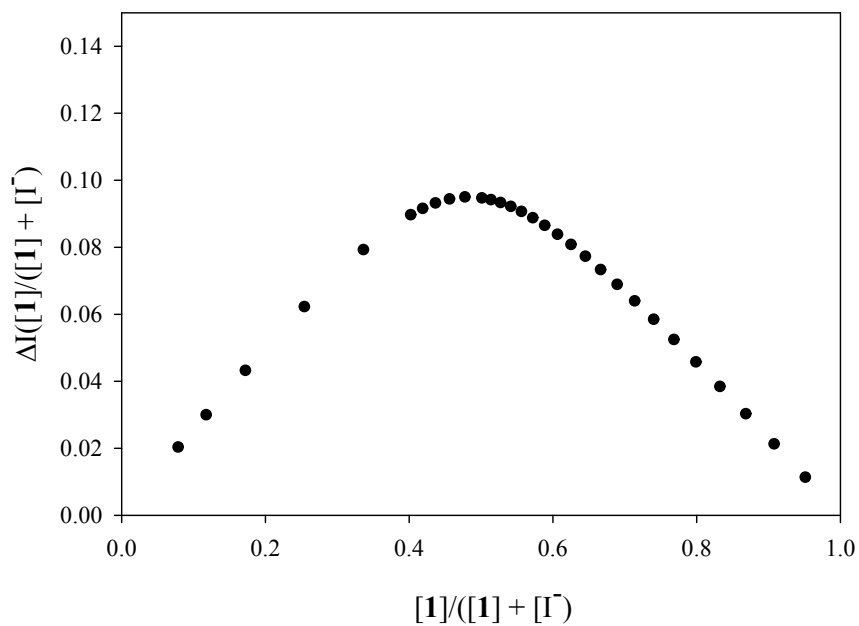

**Fig. S8.** Job plot analysis of **1** for the binding of iodide in  $\text{CH}_3\text{CN}$ . The change of the absorbance ( $\Delta I$ ) of **1** was determined from the titration plot as shown in Figure 5d.

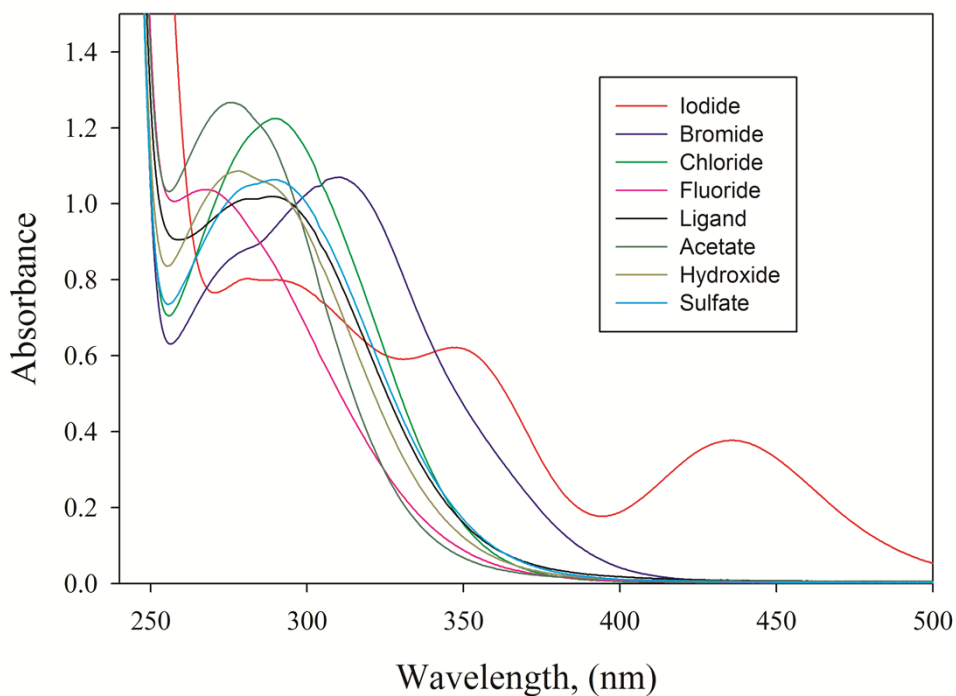

**Fig. S9.** Changes in absorbance of **1** ( $1 \times 10^{-4}$  M) in the presence of one equivalent of different anions in CH<sub>3</sub>CN at room temperature.

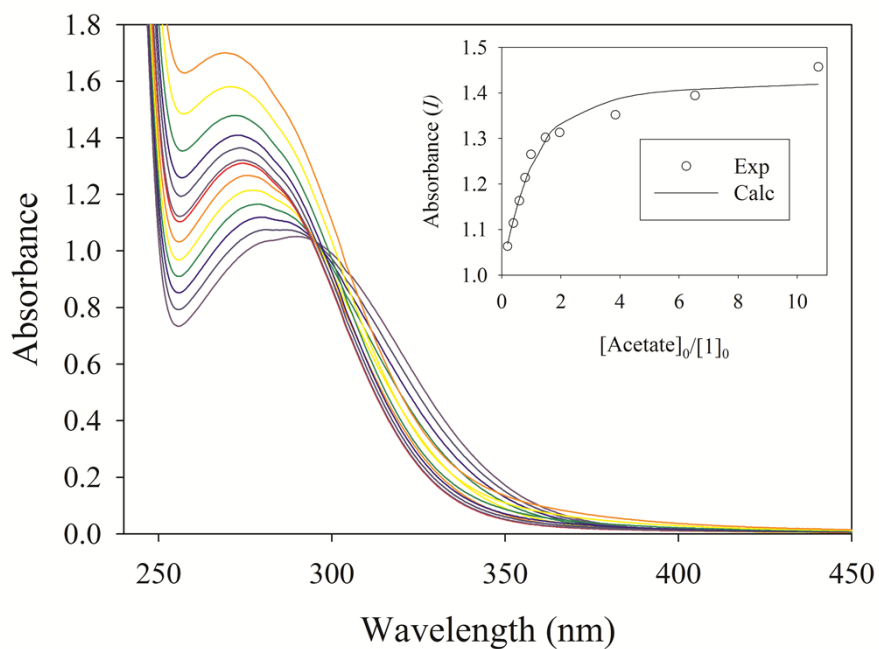

**Fig. S10.** Changes in absorption spectra of **1** ( $1 \times 10^{-4}$  M) with an increasing amount of acetate in CH<sub>3</sub>CN. The titration curve is shown in insets.

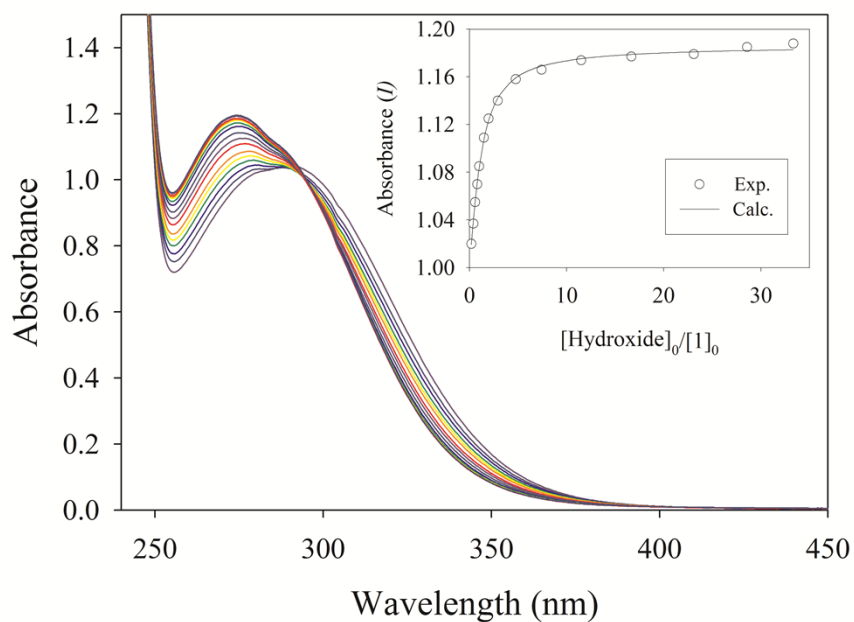

**Fig. S11.** Changes in absorption spectra of 1 ( $1 \times 10^{-4}$  M) with an increasing amount of hydroxide in CH<sub>3</sub>CN. The titration curve is shown in insets.

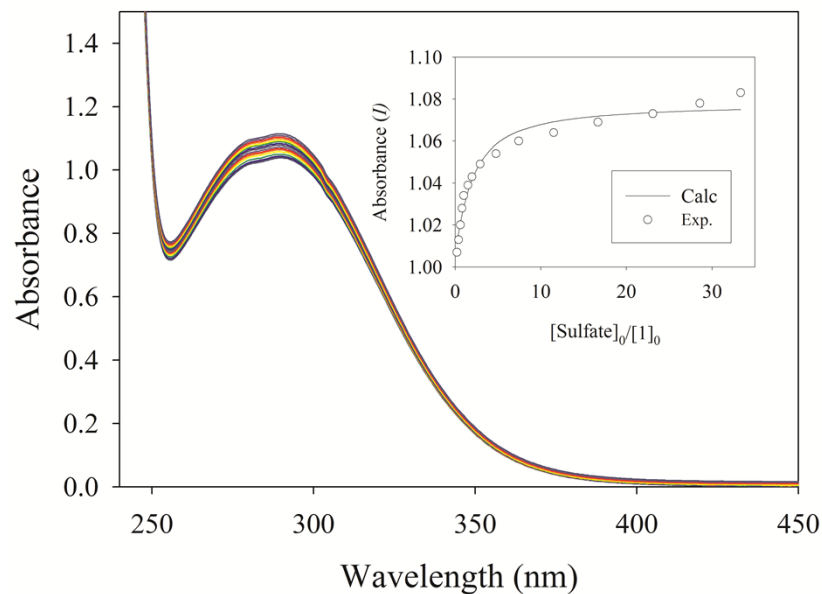

**Fig. S12.** Changes in absorption spectra of 1 ( $1 \times 10^{-4}$  M) with an increasing amount of sulfate in CH<sub>3</sub>CN. The titration curve is shown in insets.

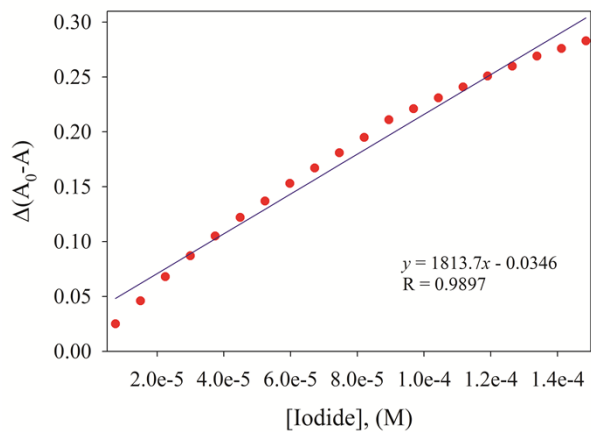

(a)

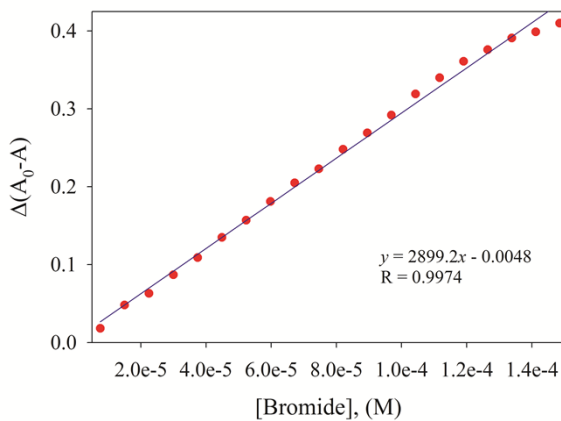

(b)

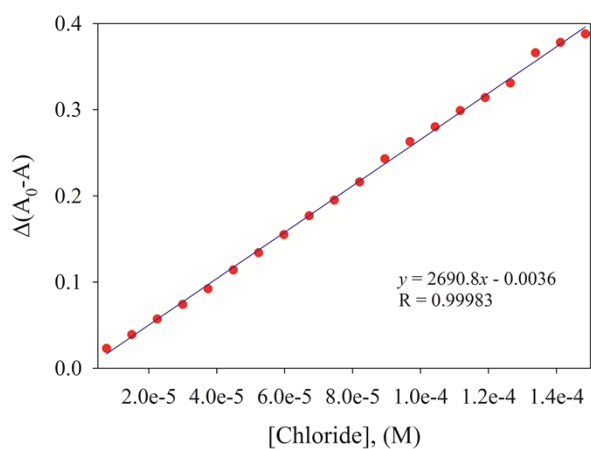

(c)

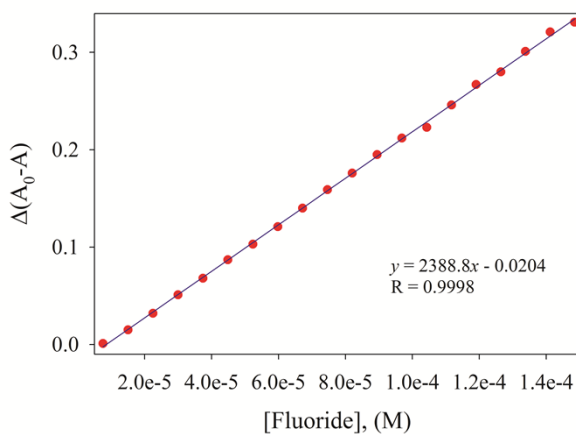

(d)

**Fig. S13.** Calibration plots using differences in absorbance against halide concentrations: iodide (a), bromide (b), chloride (c) and fluoride (d) in  $\text{CH}_3\text{CN}$ .



**Table S1:** Measurement of detection limit of the **1** for halides using UV-vis spectroscopy in 100% acetonitrile.

| Vol. of <b>1</b> ( $\mu\text{L}$ ) | Anion added ( $\mu\text{L}$ ) | Total vol. ( $\mu\text{L}$ ) | [ <b>1</b> ] M | [Anion] M | [Anion]/[ <b>1</b> ] | $\Delta(A_0-A)$ |                 |                |                |
|------------------------------------|-------------------------------|------------------------------|----------------|-----------|----------------------|-----------------|-----------------|----------------|----------------|
|                                    |                               |                              |                |           |                      | Br <sup>-</sup> | Cl <sup>-</sup> | F <sup>-</sup> | I <sup>-</sup> |
| 2000                               | 1                             | 2001                         | 1.50e-4        | 7.4963e-6 | 0.0500               | 0.0180          | 0.0230          | 0.0010         | 0.0250         |
| 2000                               | 2                             | 2002                         | 1.50e-4        | 1.4985e-5 | 0.0999               | 0.0480          | 0.0390          | 0.0150         | 0.0460         |
| 2000                               | 3                             | 2003                         | 1.50e-4        | 2.2466e-5 | 0.1498               | 0.0630          | 0.0570          | 0.0320         | 0.0680         |
| 2000                               | 4                             | 2004                         | 1.50e-4        | 2.9940e-5 | 0.1996               | 0.0870          | 0.0740          | 0.0510         | 0.0870         |
| 2000                               | 5                             | 2005                         | 1.50e-4        | 3.7406e-5 | 0.2494               | 0.1090          | 0.0920          | 0.0680         | 0.1050         |
| 2000                               | 6                             | 2006                         | 1.50e-4        | 4.4865e-5 | 0.2991               | 0.1350          | 0.1140          | 0.0870         | 0.1220         |
| 2000                               | 7                             | 2007                         | 1.50e-4        | 5.2317e-5 | 0.3488               | 0.1570          | 0.1340          | 0.1030         | 0.1370         |
| 2000                               | 8                             | 2008                         | 1.50e-4        | 5.9761e-5 | 0.3984               | 0.1810          | 0.1550          | 0.1210         | 0.1530         |
| 2000                               | 9                             | 2009                         | 1.50e-4        | 6.7198e-5 | 0.4480               | 0.2050          | 0.1770          | 0.1400         | 0.1670         |
| 2000                               | 10                            | 2010                         | 1.50e-4        | 7.4627e-5 | 0.4975               | 0.2230          | 0.1950          | 0.1590         | 0.1810         |
| 2000                               | 11                            | 2011                         | 1.50e-4        | 8.2049e-5 | 0.5470               | 0.2480          | 0.2160          | 0.1760         | 0.1950         |
| 2000                               | 12                            | 2012                         | 1.50e-4        | 8.9463e-5 | 0.5964               | 0.2690          | 0.2430          | 0.1950         | 0.2110         |
| 2000                               | 13                            | 2013                         | 1.50e-4        | 9.6870e-5 | 0.6458               | 0.2920          | 0.2630          | 0.2120         | 0.2210         |
| 2000                               | 14                            | 2014                         | 1.50e-4        | 1.0427e-4 | 0.6951               | 0.3190          | 0.2800          | 0.2230         | 0.2310         |
| 2000                               | 15                            | 2015                         | 1.50e-4        | 1.1166e-4 | 0.7444               | 0.3400          | 0.2990          | 0.2460         | 0.2410         |
| 2000                               | 16                            | 2016                         | 1.50e-4        | 1.1905e-4 | 0.7937               | 0.3610          | 0.3140          | 0.2670         | 0.2510         |
| 2000                               | 17                            | 2017                         | 1.50e-4        | 1.2643e-4 | 0.8428               | 0.3760          | 0.3310          | 0.2800         | 0.2600         |
| 2000                               | 18                            | 2018                         | 1.50e-4        | 1.3380e-4 | 0.8920               | 0.3910          | 0.3660          | 0.3010         | 0.2690         |
| 2000                               | 19                            | 2019                         | 1.50e-4        | 1.4116e-4 | 0.9411               | 0.3990          | 0.3780          | 0.3210         | 0.2760         |
| 2000                               | 20                            | 2020                         | 1.50e-4        | 1.4851e-4 | 0.9901               | 0.4100          | 0.3880          | 0.3310         | 0.2830         |

**Table S2:** Limit of detection (LOD) was calculated using the linear regression of the calibration curve applying to the equation:  $\text{LOD}=3\sigma/S$ . Where,  $\sigma$  is the standard deviation of the absorbance and S is the slope of the calibration curve.

| Anion    | LOD, (M)              |
|----------|-----------------------|
| Fluoride | $3.01 \times 10^{-6}$ |
| Chloride | $5.24 \times 10^{-6}$ |
| Bromide  | $9.72 \times 10^{-6}$ |
| Iodide   | $15.6 \times 10^{-6}$ |

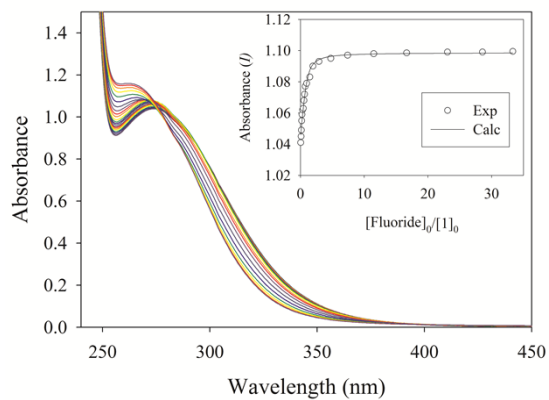

a

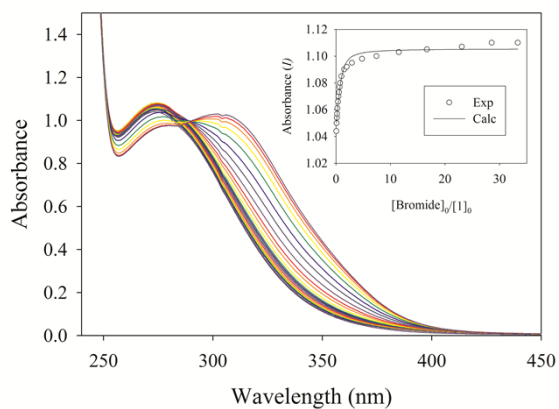

b

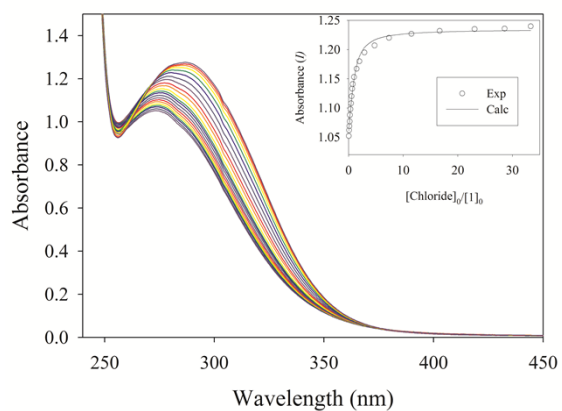

c

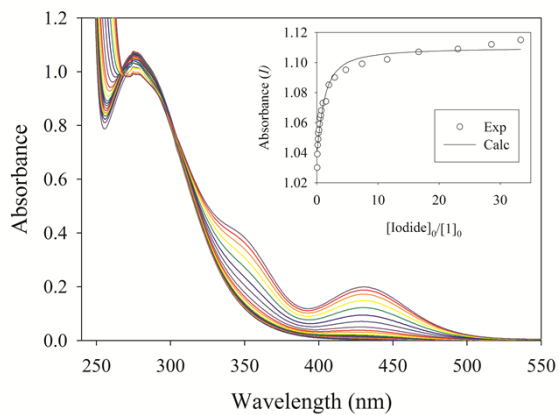

d

**Fig. S14.** Changes in absorption spectra of **1** ( $1 \times 10^{-4}$  M) with an increasing amount of fluoride (a), bromide (b), chloride (c) and iodide (d) in 20% water in  $\text{CH}_3\text{CN}$ . The titration curves are shown in insets.

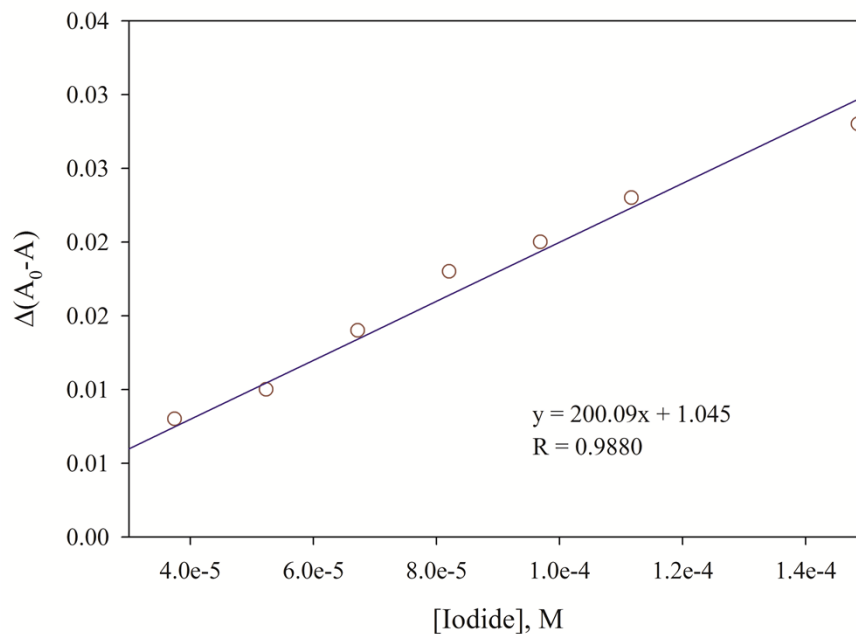

**Fig. S15.** Calibration plot using difference in absorbance against iodide concentration in 20% water in CH<sub>3</sub>CN. Limit of detection for iodide (20% water in Acetonitrile) =  $2.09 \times 10^{-5}$  M

**Table S3:** Measurement of detection limit of **1** for iodide using UV-vis spectroscopy in 20% water in acetonitrile.

| Vol. of <b>1</b> (μL) | Anion added (μL) | Total vol. (μL) | [ <b>1</b> ] M | [Iodide] (M) | [Iodide]/[ <b>1</b> ] | Δ(A <sub>0</sub> -A) |
|-----------------------|------------------|-----------------|----------------|--------------|-----------------------|----------------------|
| 2000                  | 4                | 2004            | 1.50e-4        | 2.9940e-5    | 0.1996                | 0.0040               |
| 2000                  | 5                | 2005            | 1.50e-4        | 3.7406e-5    | 0.2494                | 0.0080               |
| 2000                  | 7                | 2007            | 1.50e-4        | 5.2317e-5    | 0.3488                | 0.0100               |
| 2000                  | 9                | 2009            | 1.50e-4        | 6.7198e-5    | 0.4480                | 0.0140               |
| 2000                  | 11               | 2011            | 1.50e-4        | 8.2049e-5    | 0.5470                | 0.0180               |
| 2000                  | 13               | 2013            | 1.50e-4        | 9.6870e-5    | 0.6458                | 0.0200               |
| 2000                  | 15               | 2015            | 1.50e-4        | 1.1166e-4    | 0.7444                | 0.0230               |
| 2000                  | 20               | 2020            | 1.50e-4        | 1.4851e-4    | 0.9901                | 0.0280               |

**Table S4.** Lowest ten excited states (eV) and oscillator strengths of all complexes

| State | Fluoride             |               | Chloride             |               | Bromide              |               | Iodide               |               |
|-------|----------------------|---------------|----------------------|---------------|----------------------|---------------|----------------------|---------------|
|       | E <sub>abs</sub> /eV | Osc. strength |
| 1     | 1.4758               | 0.0030        | 1.2969               | 0.0028        | 1.2512               | 0.0026        | 1.2087               | 0.0023        |
| 2     | 1.4885               | 0.0031        | 1.3006               | 0.0028        | 1.2536               | 0.0025        | 1.2097               | 0.0023        |
| 3     | 1.9828               | 0.0001        | 1.9155               | 0.0000        | 1.8621               | 0.0000        | 1.8110               | 0.0000        |
| 4     | 1.9860               | 0.0001        | 1.9171               | 0.0000        | 1.8638               | 0.0000        | 1.8114               | 0.0000        |
| 5     | 3.4387               | 0.0000        | 3.4344               | 0.0000        | 3.3370               | 0.0006        | 2.7825               | 0.0003        |
| 6     | 3.4443               | 0.0000        | 3.4393               | 0.0000        | 3.3379               | 0.0006        | 2.7828               | 0.0003        |
